# Supplementary material for: The pH-Responsive Liposomes—The Effect of PEGylation on Release Kinetics and Cellular Uptake in Glioblastoma Cells
Source: MDPI journal article supplement (doi:10.3390/pharmaceutics14061125), 2022-05-25
Supplement: s1 [file s1]

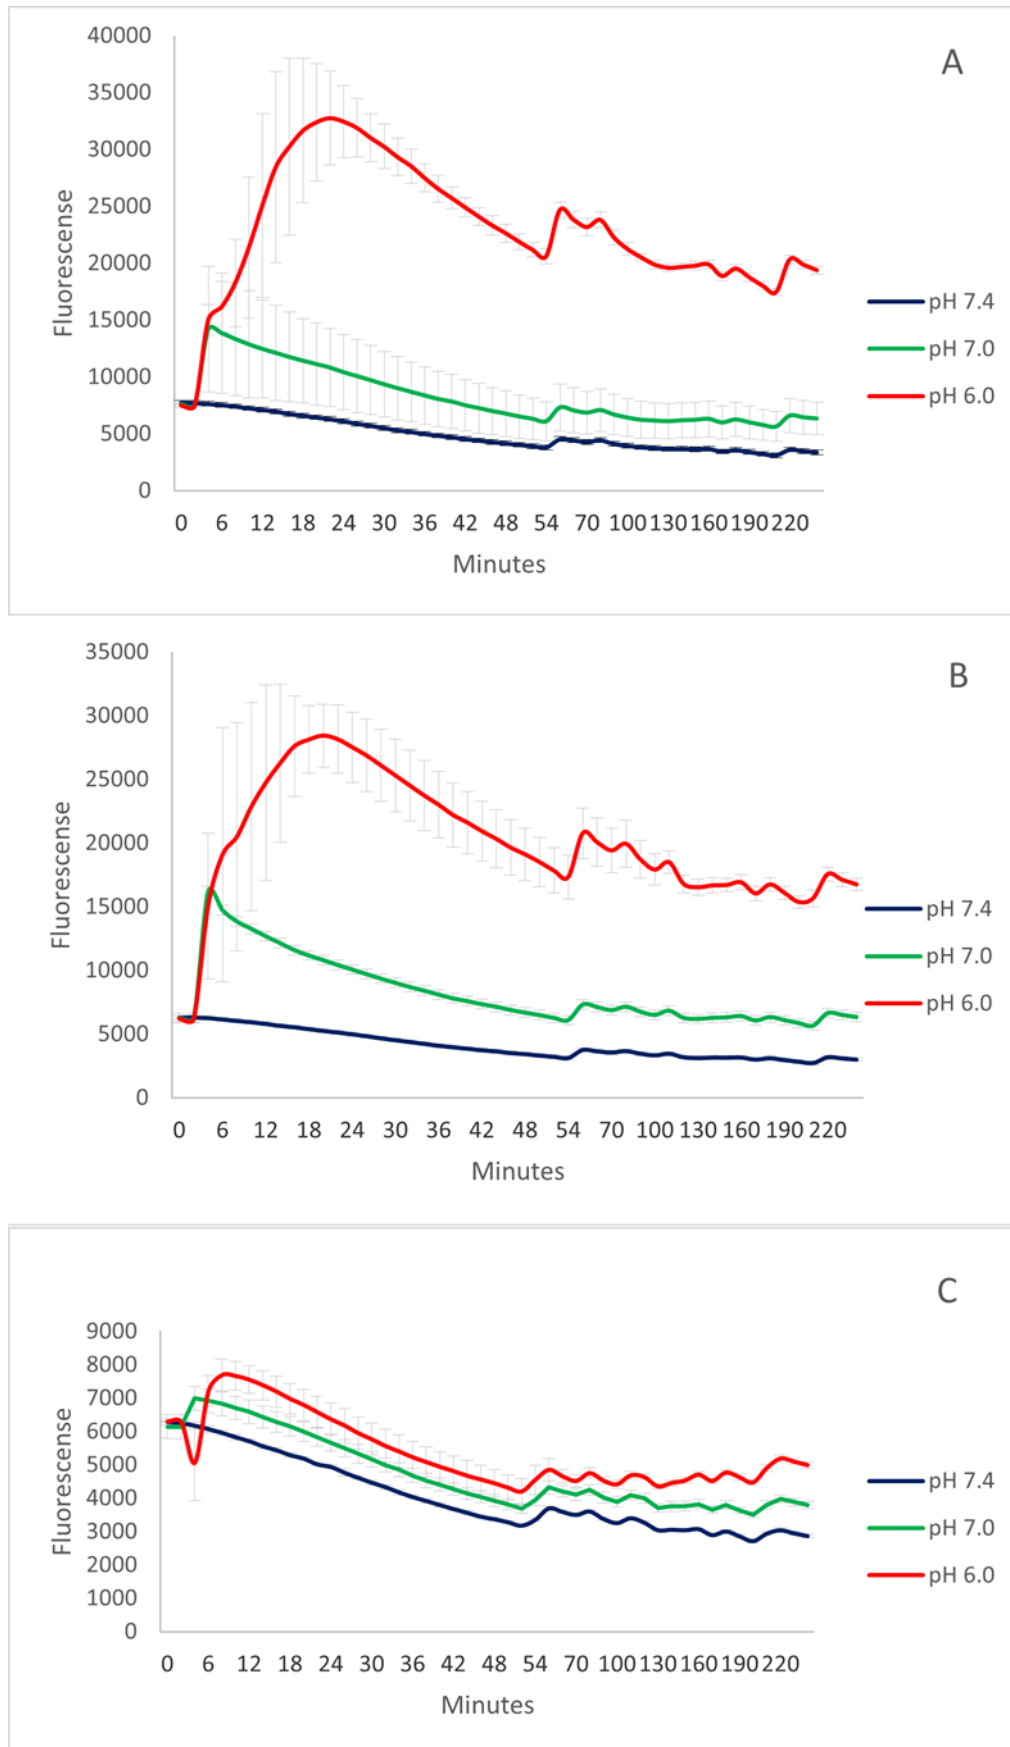

**Figure S1:** Prolonged pH-dependent calcein release from Ph-Lip, Ph-Lip-PEG750 and Ph-Lip-PEG2000 after addition of HCl to a 7.4 PBS buffer medium. Data represents the mean  $\pm$  standard deviation ( $n = 3$ ). A: Ph-

Lip B: Ph-Lip-PEG750 and C: Ph-Lip-PEG2000. pH-Lip: pH-responsive liposomes without PEG, pH-Lip-PEG750: pH-responsive with DSPE-PEG750, pH-Lip-PEG2000: pH-responsive with DSPE-PEG2000, Lip: non-pH-responsive, non-PEGylated liposomes.

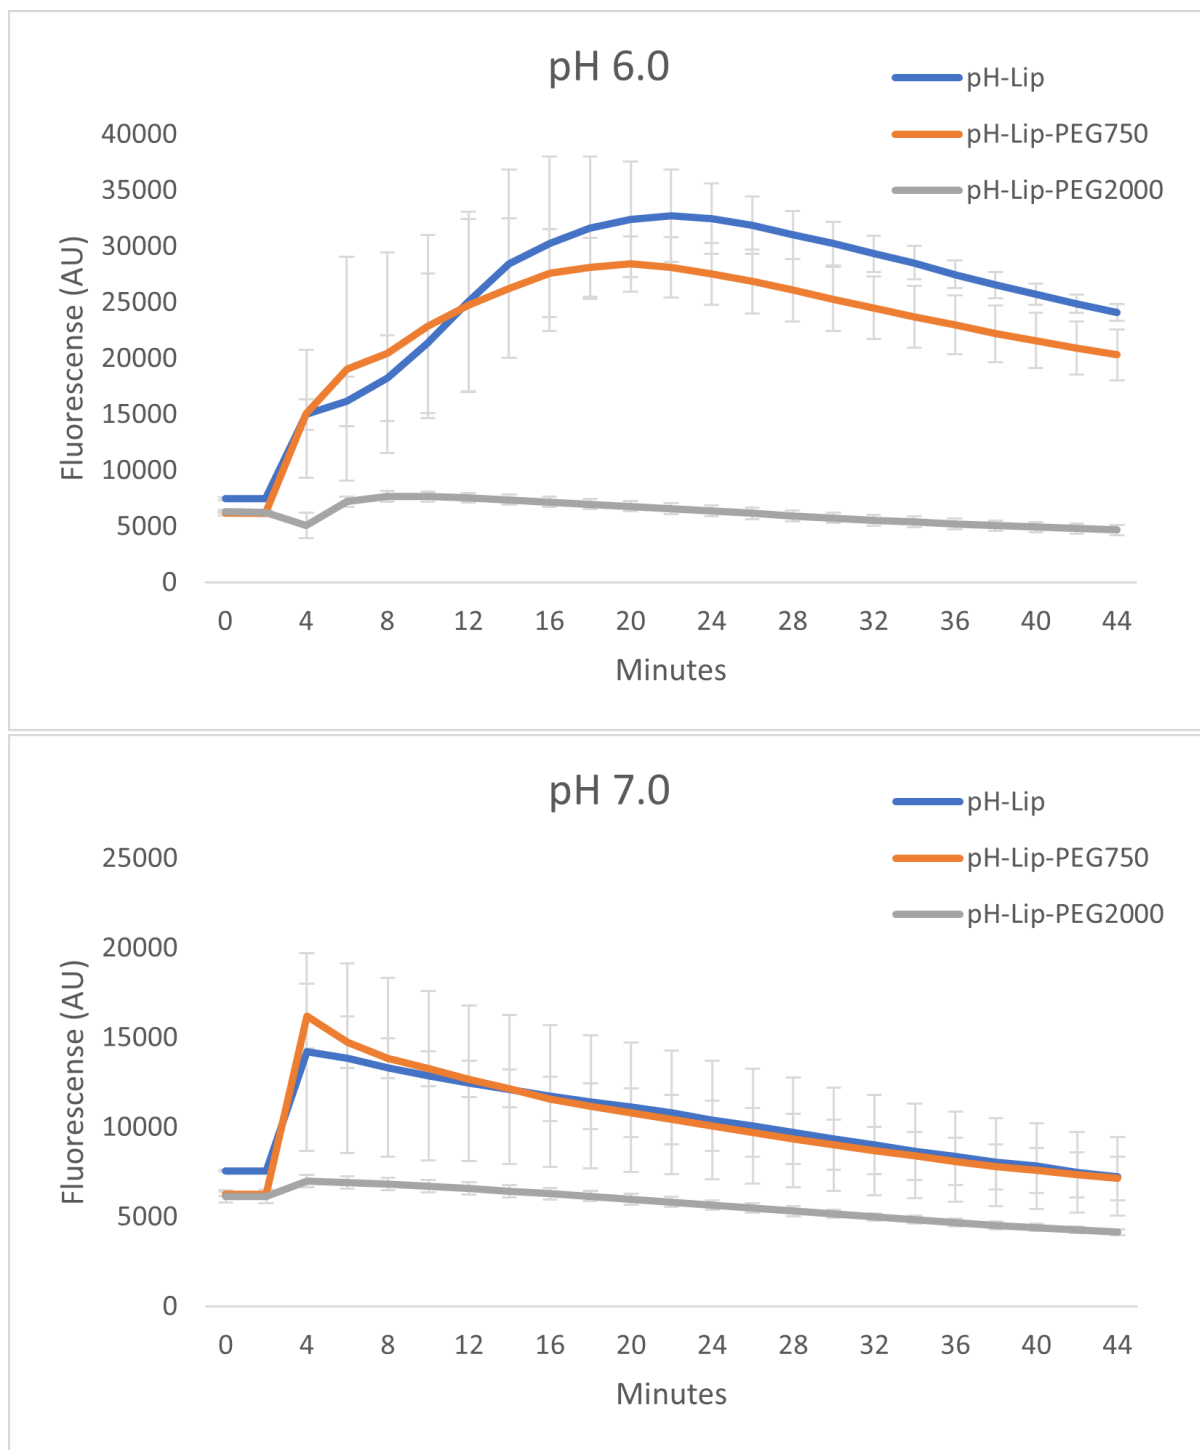

**Figure S2:** Comparison of pH-dependent calcein release at specific pH. Data represents the mean  $\pm$  standard deviation ( $n = 3$ ). pH-Lip: pH-responsive liposomes without PEG, pH-Lip-PEG750: pH-responsive with DSPE-PEG750, pH-Lip-PEG2000: pH-responsive with DSPE-PEG2000.
